# Supplementary material for: Decreases and Pronounced Geographic Variability in Antibiotic Prescribing in Medicaid
Source: MDPI journal article supplement (doi:10.3390/pharmacy12020046), 2024-03-01
Supplement: s1 [file s1]

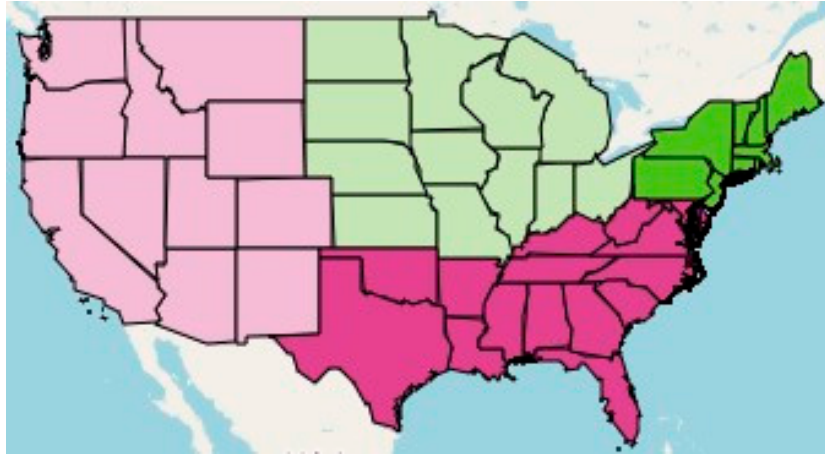

**Supplemental Figure S1.** US Census regions including the West, Midwest, South, and Northeast. Alaska and Hawaii are not shown. Image created with <http://www.heatmapper.ca/geomap/>.
